# Supplementary material for: Comparison between two derivatization methods of nitrite ion labeled with15N applied to liquid chromatography-tandem mass spectrometry
Source: Royal Society of Chemistry journal article supplement (doi:10.1039/c8ay01206g), 2018-01-01
Supplement: c8ay01206g1.pdf [file c8ay01206g1.pdf]

Supplementary data:

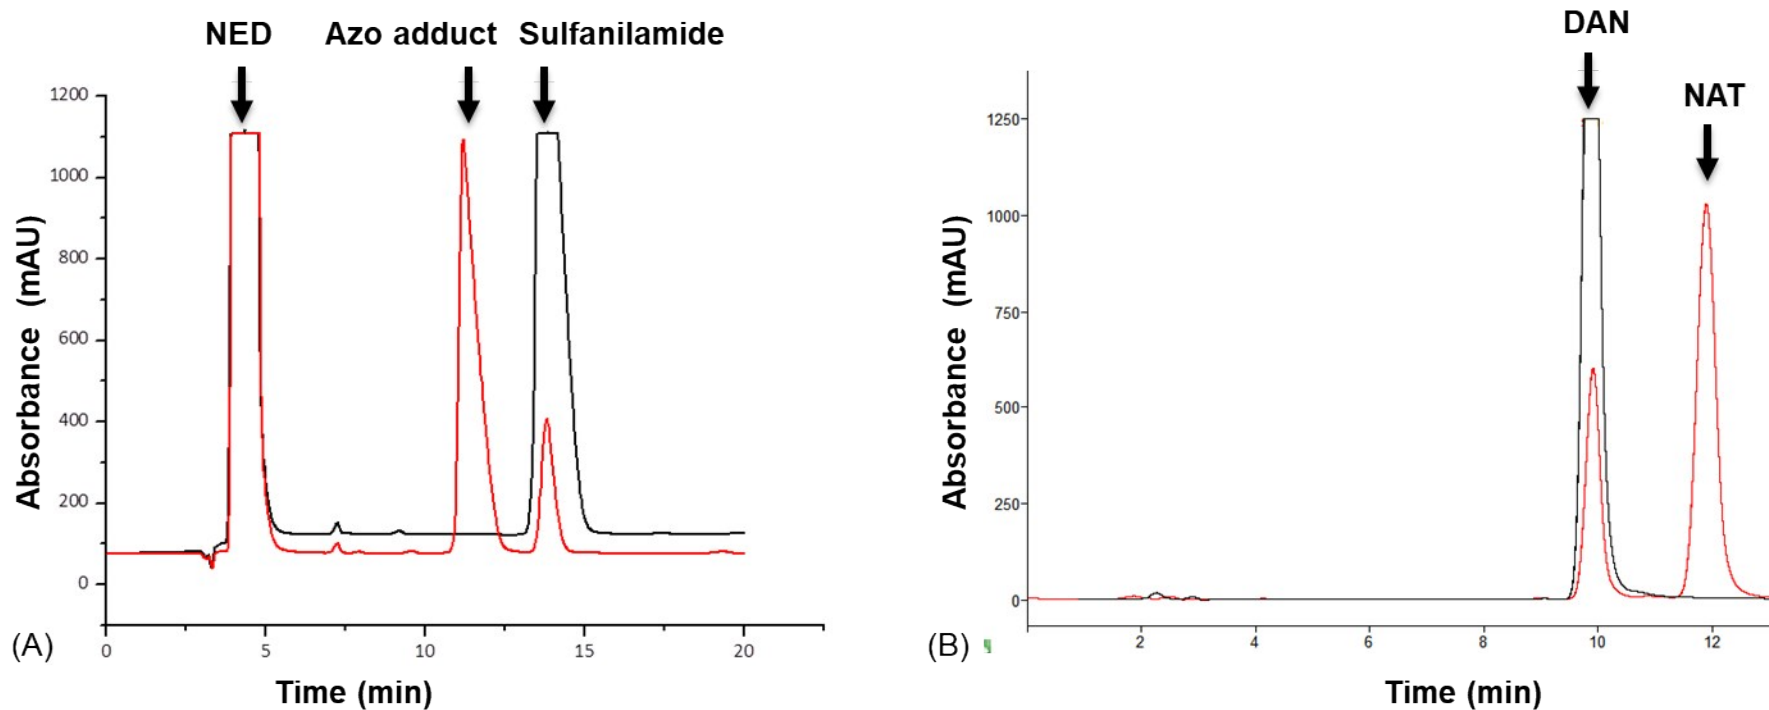

Figure S1. Typical chromatograms corresponding to (A) the azo adduct resulting from the derivatization of 10 mM NO<sub>2</sub><sup>-</sup> with Griess method in red or blank (ultrapure water) in black by LC-UV at  $\lambda = 220$  nm; (B) 2,3-naphthotriazole (NAT) resulting from the derivatization of 5 mM NO<sub>2</sub><sup>-</sup> in red or blank (ultrapure water) in black by LC-UV at  $\lambda = 330$  nm.
